# Supplementary material
Source: PubMed Central journal article supplement (PMC1994601)
Supplement: JCI0730605sd.pdf [file JCI0730605sd.pdf]

## Supplemental figure 1

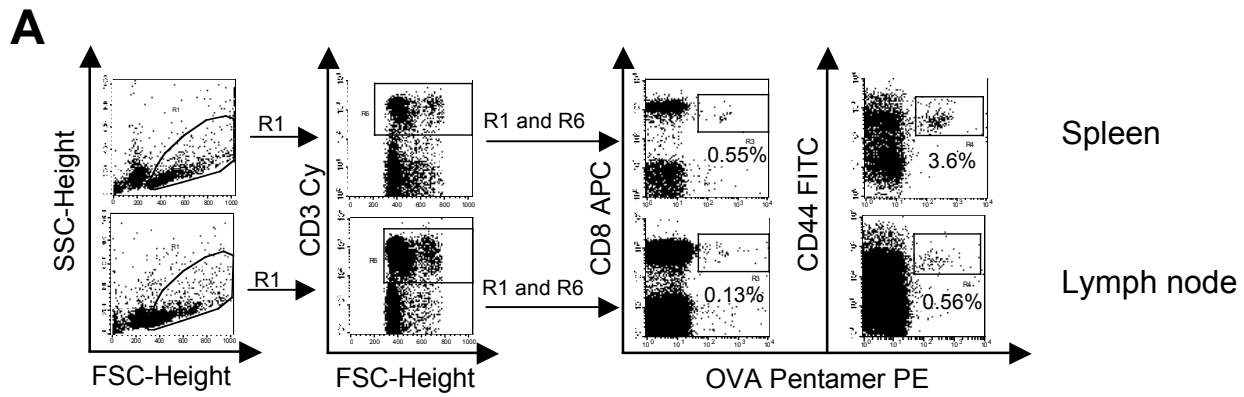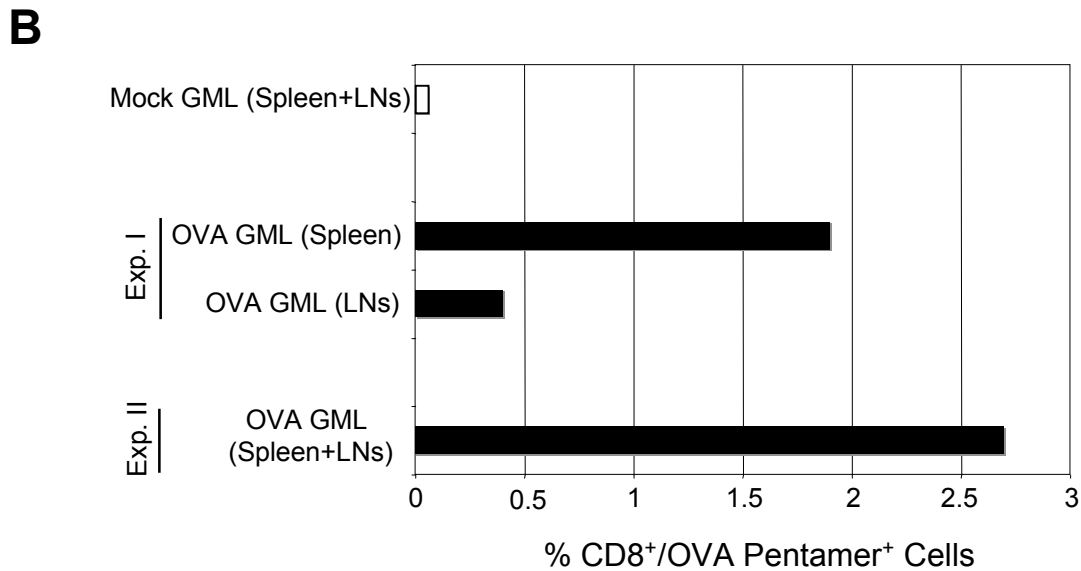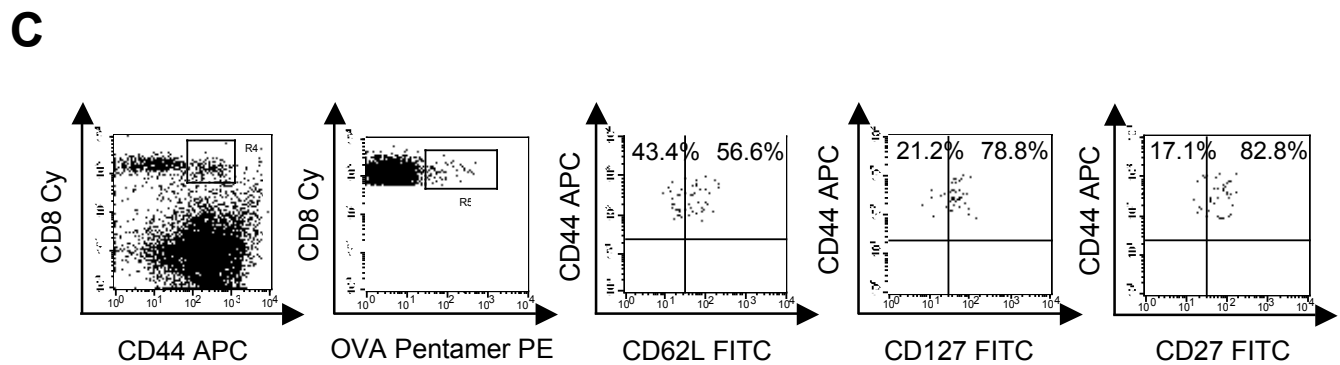

**Supplemental Figure 2**

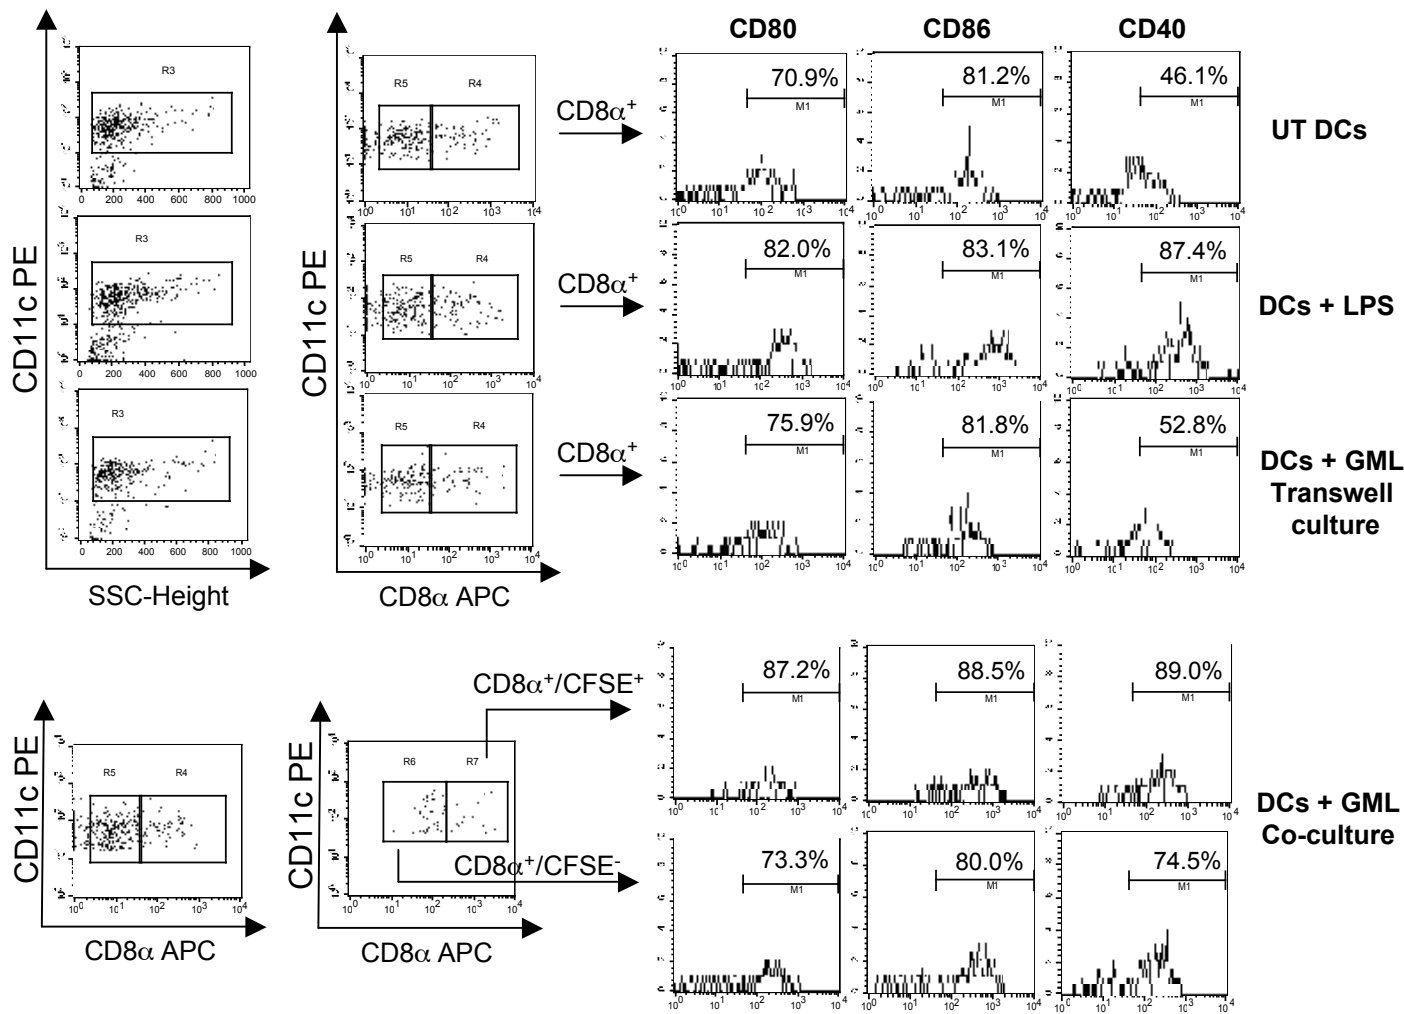

### Supplemental Figure 1

OVA-GML activate endogenous OVA-specific CD8<sup>+</sup> T-cells. B6 mice were treated 3 times at 2 weeks intervals with OVA-GML (4x10<sup>6</sup>). **(A)** Fifteen or forty days later, **cells** from spleen and lymph nodes were collected and stained with **CD3, CD8, CD44 mAbs and with H2K<sup>b</sup>-SIINFEKL OVA Pentamer. Analysis of CD3<sup>+</sup> cells for OVA Pentamer and either CD8 or CD44 staining is shown. (B)** The results of two independent experiments are reported, as percentage of CD8<sup>+</sup>/OVA Pentamer<sup>+</sup> Cells. **(C) CD8<sup>+</sup>/CD44<sup>+</sup> cells were analyzed for the expression of OVA Pentamer, CD62L, CD127 and CD27 T-cell markers.**

### Supplemental Figure 2

GML induce maturation of phagocytosing CD11c<sup>+</sup>CD8α<sup>+</sup> DCs in vitro. CD11c<sup>+</sup> DCs purified from SLO of naive B6 mice, were either left untreated, activated with LPS, co-cultured with CFSE-labeled GML or cultured with CFSE-labeled GML in transwell plate conditions. Twenty-four hours later, CD11c<sup>+</sup>CD8α<sup>+</sup> DCs were analyzed for CD80, CD86 and CD40 expression. In co-culture conditions, the analysis was performed on both CD11c<sup>+</sup>CD8α<sup>+</sup>CFSE<sup>+</sup> phagocytosing DCs and CD11c<sup>+</sup>CD8α<sup>+</sup>CFSE<sup>-</sup> non-phagocytosing DCs.
